# Supplementary material
Source: PubMed Central journal article supplement (PMC8837867)
Supplement: jlms-12-e86-s001.pdf [file jlms-12-e86-s001.pdf]

# Supplementary file 1

## A. Absorption by Water

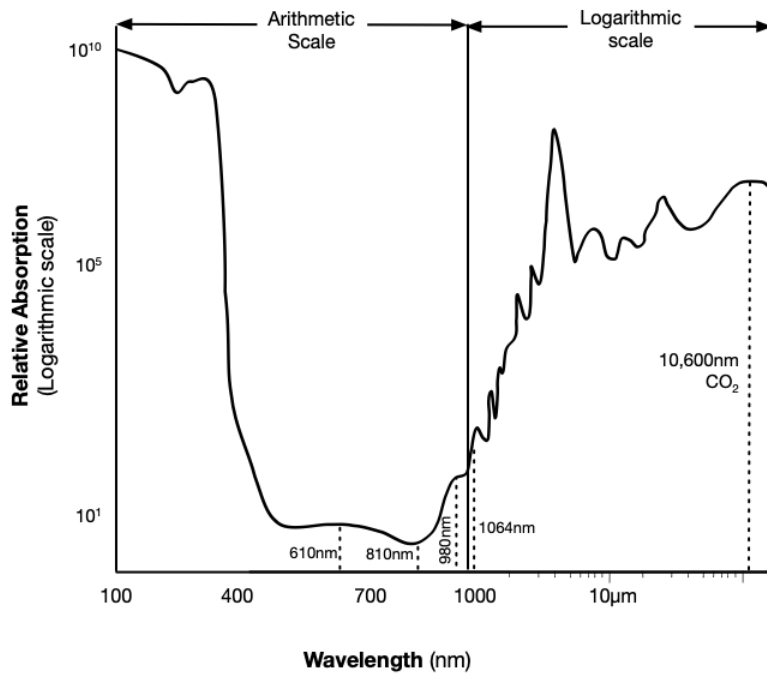

## B. Absorption by Eumelanin

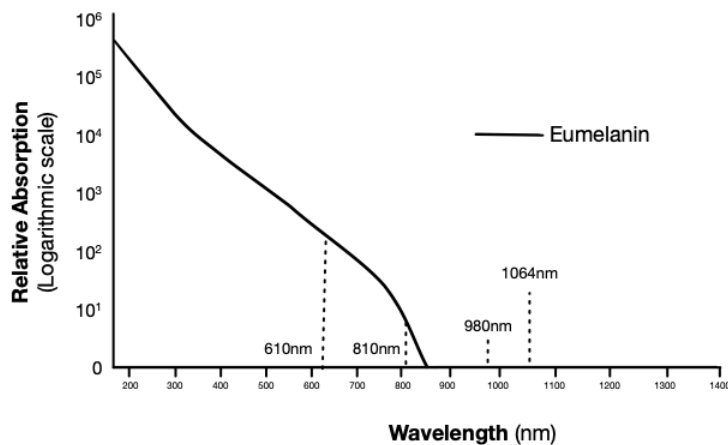

**Figure S1.** The relative absorption of light by water (A) or by melanin (B) per respective specific wavelengths is shown. The wavelengths most commonly used in photobiomodulation and comparatively reviewed in this manuscript are shown by dotted lines. The high absorption of 10,600 nm wavelength light by water is used by carbon dioxide lasers for flash boiling, which is used in laser surgery (adapted from Toselli et al<sup>15</sup> and Splinter et al<sup>16</sup>).
